# Supplementary material for: Catalytic reactions using superacids in new types of ionic liquids
Source: Royal Society of Chemistry journal article supplement (doi:10.1039/b818788f), 2009-01-01
Supplement: b818788f.pdf [file b818788f.pdf]

## Supporting Information

Harmer et al., "Catalytic Reactions Using Superacids in New Types of Ionic Liquids"

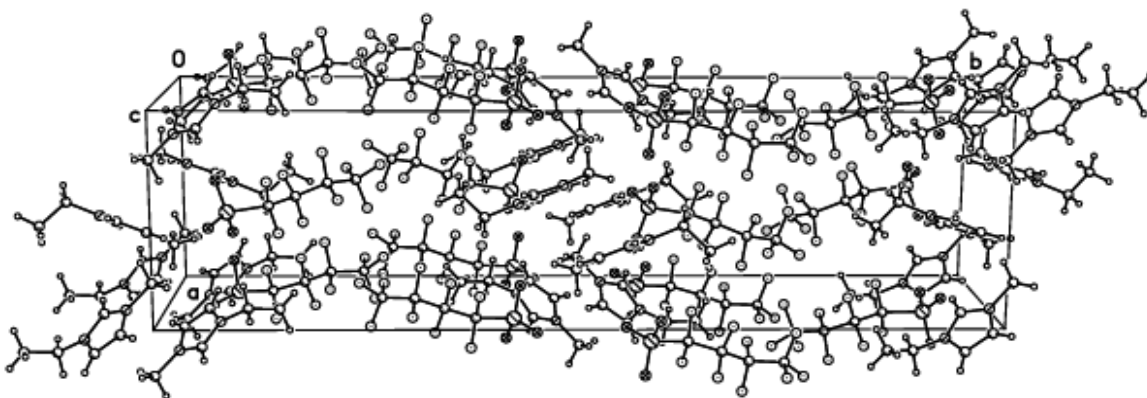

**Figure 1. Crystal Packing of EMIM-nanoflate with left-right layers of EMIM-SO<sub>3</sub> and fluoroalkyl regions.**

Crystal data for EMIM-nanoflate (05219): C<sub>10</sub>H<sub>11</sub>F<sub>9</sub>N<sub>2</sub>O<sub>3</sub>S, FW = 410.27, monoclinic, space group P2<sub>1</sub>/c,  $a = 9.178(4)$  Å,  $b = 34.444(13)$  Å,  $c = 10.022(4)$  Å,  $\beta = 91.711(7)^\circ$ ,  $U = 3167(2)$  Å<sup>3</sup>,  $T = -100.^\circ\text{C}$ ,  $Z = 8$ ,  $D_{\text{calcd}} = 1.72\text{g/cm}^3$ . Data were collected using a Bruker Apex-II CCD system equipped with MoK $\alpha$  radiation on a non-merohedrally twinned crystal. Cell\_now, Saintplus and Twinabs used to integrate data on two domains yielding 11349 total reflections. Structure solved and refined on F<sup>2</sup> using SHELXTL (Sheldrick, G. *Shelxtl Software Suite*, Version 5.1; Bruker AXS Corp: Madison, Wisconsin, 1996). All non-hydrogen atoms were refined with anisotropic thermal parameters. Hydrogen atoms were idealized using a riding model. The final R values were  $wR_2 = 0.258$  and  $R_1 = 0.171$  using all data. The high-r factors are attributed to some un-modeled overlap twinned

crystal. Crystallographic data have been deposited at the Cambridge Crystallographic Data Centre with deposition numbers CCDC #####.
